# Supplementary figures and images for: Dynamics of the axon plasma membrane skeleton
Source: Royal Society of Chemistry journal article supplement (doi:10.1039/d2sm01602h), 2023-01-01

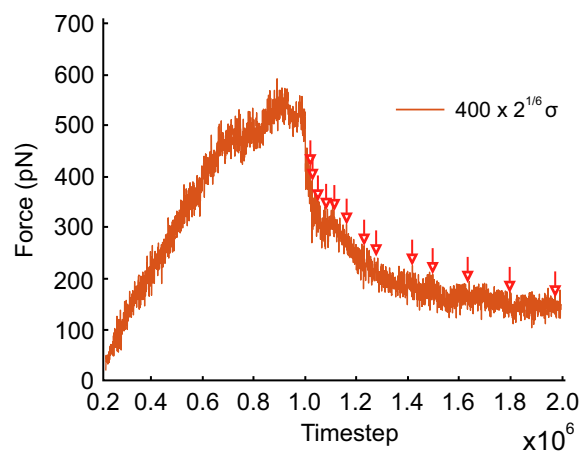

Supplement: d2sm01602h8.pdf [file d2sm01602h8.pdf]

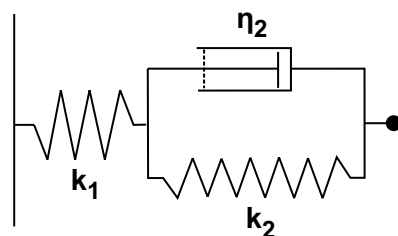

Supplement: d2sm01602h9.pdf [file d2sm01602h9.pdf]
